# Supplementary material for: P-type doping in 2M-WS2 for a complete phase diagram
Source: Royal Society of Chemistry journal article supplement (doi:10.1039/d0dt04313c), 2021-01-01
Supplement: d0dt04313c1.pdf [file d0dt04313c1.pdf]

*Supporting Information for*

# P-type doping in 2M-WS<sub>2</sub> for a complete phase diagram

*Chendong Zhao,<sup>abe</sup> Xiangli Che,<sup>ade</sup> Zhuang Zhang<sup>ab</sup>, Fuqiang Huang<sup>\*acd</sup>*

<sup>a</sup> State Key Laboratory of High Performance Ceramics and Superfine Microstructure, Shanghai Institute of Ceramics, Chinese Academy of Sciences, Shanghai 200050, P.R. China. E-mail: huangfq@mail.sic.ac.cn

<sup>b</sup> University of Chinese Academy of Sciences, Beijing, 100049, P. R. China

<sup>c</sup> State Key Laboratory of Rare Earth Materials Chemistry and Applications, College of Chemistry and Molecular Engineering, Peking University, Beijing 100871, P. R. China

<sup>d</sup> CAS Center for Excellence in Superconducting Electronic (CENSE), Shanghai 200050, China.

<sup>e</sup> These authors contributed equally: Chendong Zhao, Xiangli Che.

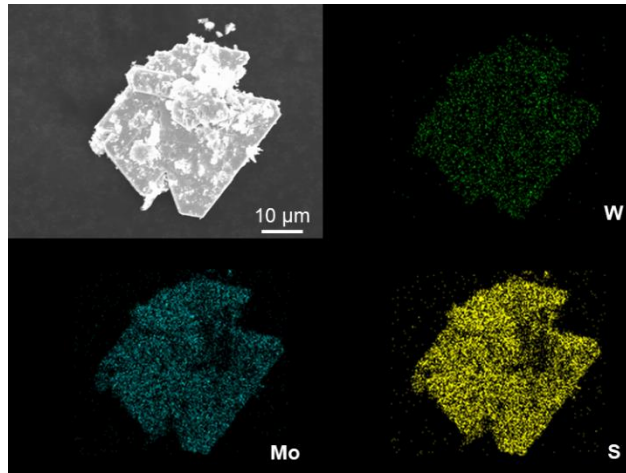

**Figure S1.** The elemental mapping of  $W_{0.9}Mo_{0.1}S_2$ .

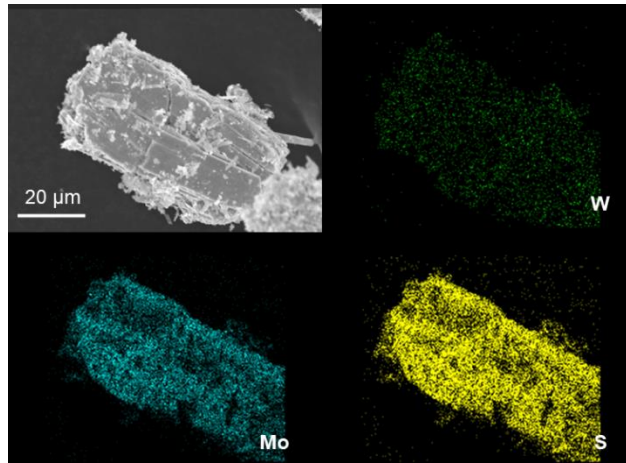

**Figure S2.** The elemental mapping of  $W_{0.8}Mo_{0.2}S_2$ .

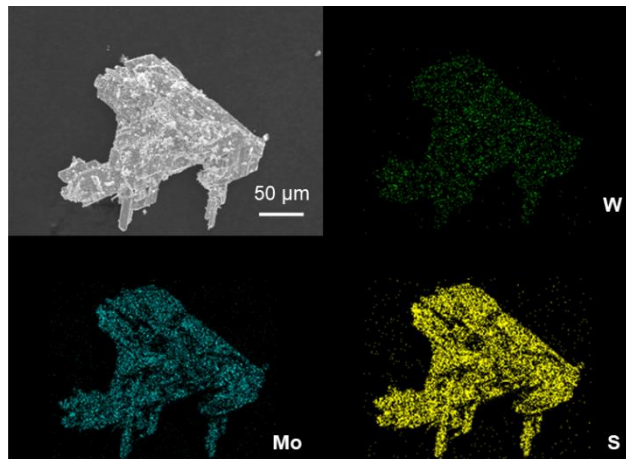

**Figure S3.** The elemental mapping of  $W_{0.7}Mo_{0.3}S_2$ .

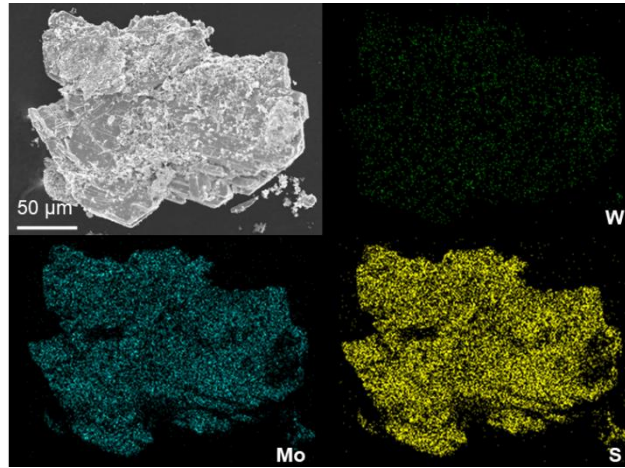

**Figure S4.** The elemental mapping of  $W_{0.6}Mo_{0.4}S_2$ .

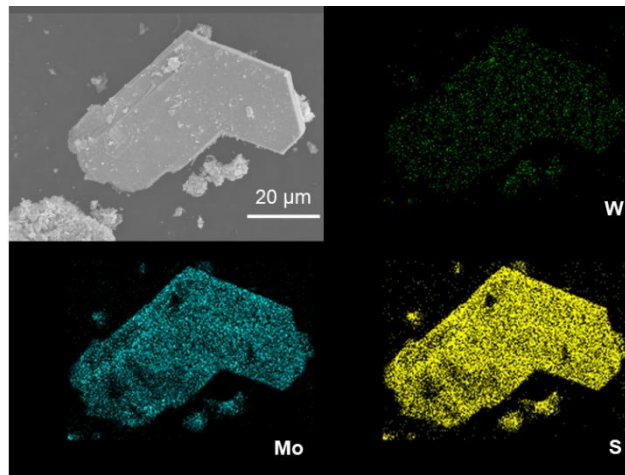

**Figure S5.** The elemental mapping of  $W_{0.5}Mo_{0.5}S_2$ .

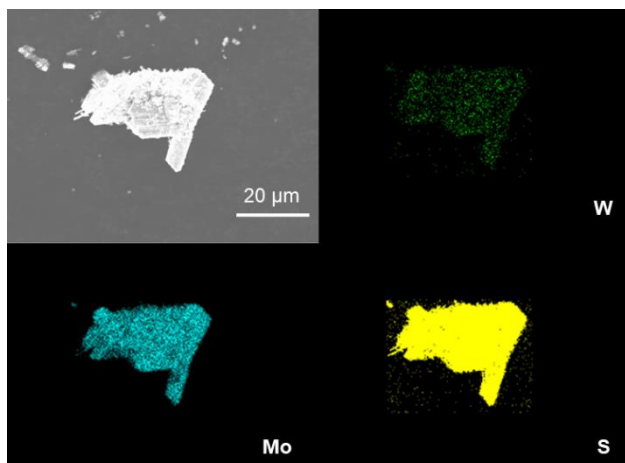

**Figure S6.** The elemental mapping of  $W_{0.4}Mo_{0.6}S_2$ .

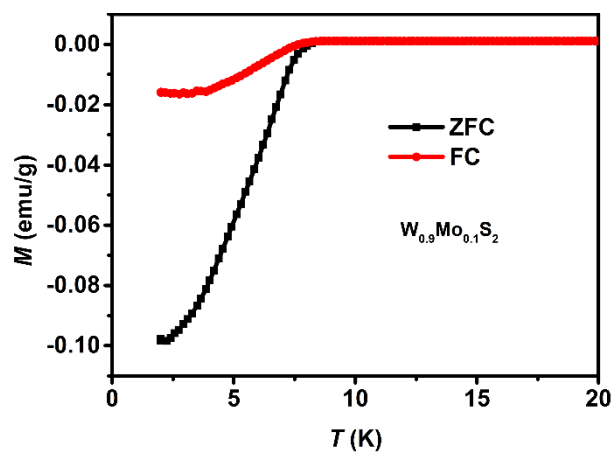

**Figure S9.** Temperature dependence of magnetic susceptibility for  $W_{0.9}Mo_{0.1}S_2$  under the magnetic field of 10 Oe with zero-field-cooling curve (black) and field-cooling curve (red).

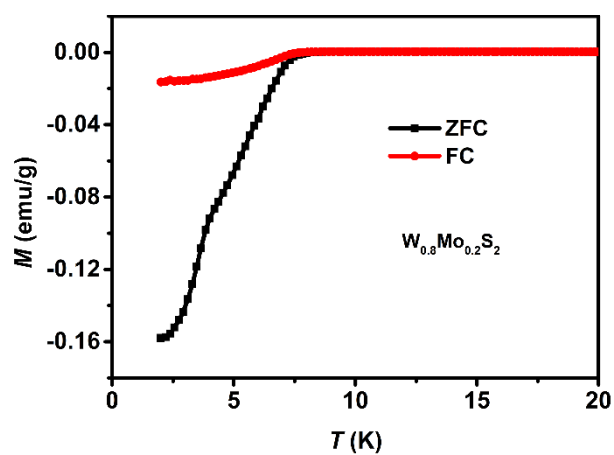

**Figure S10.** Temperature dependence of magnetic susceptibility for  $W_{0.8}Mo_{0.2}S_2$  under the magnetic field of 10 Oe with zero-field-cooling curve (black) and field-cooling curve (red).

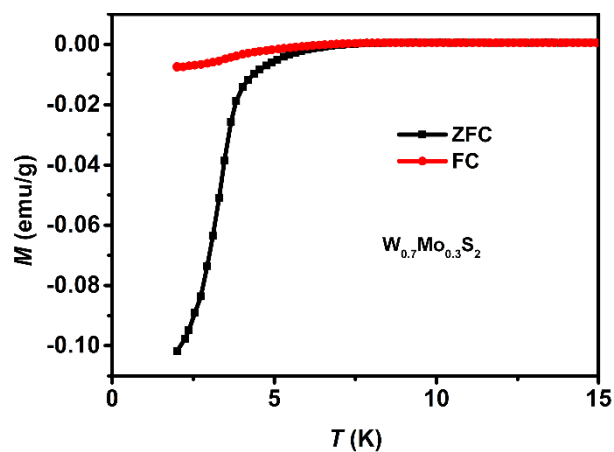

**Figure S11.** Temperature dependence of magnetic susceptibility for  $W_{0.7}Mo_{0.3}S_2$  under the magnetic field of 10 Oe with zero-field-cooling curve (black) and field-cooling curve (red).

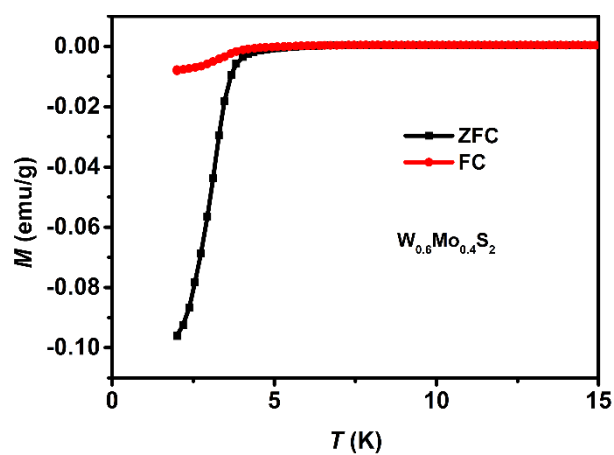

**Figure S12.** Temperature dependence of magnetic susceptibility for  $W_{0.6}Mo_{0.4}S_2$  under the magnetic field of 10 Oe with zero-field-cooling curve (black) and field-cooling curve (red).

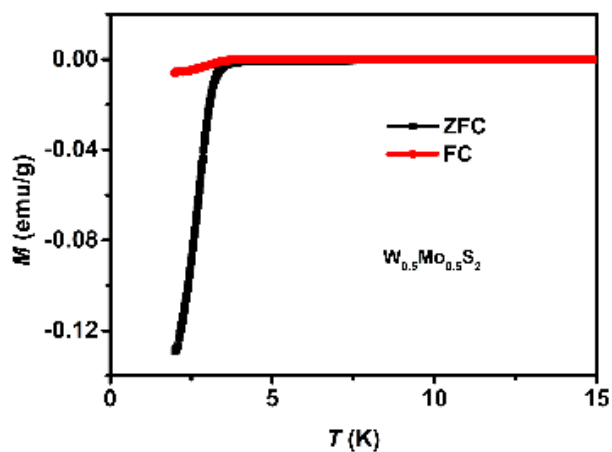

**Figure S13.** Temperature dependence of magnetic susceptibility for  $W_{0.5}Mo_{0.5}S_2$  under the magnetic field of 10 Oe with zero-field-cooling curve (black) and field-cooling curve (red).

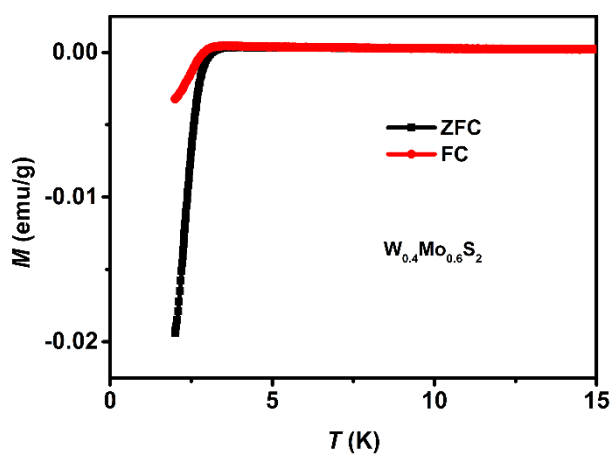

**Figure S14.** Temperature dependence of magnetic susceptibility for  $W_{0.4}Mo_{0.6}S_2$  under the magnetic field of 10 Oe with zero-field-cooling curve (black) and field-cooling curve (red).

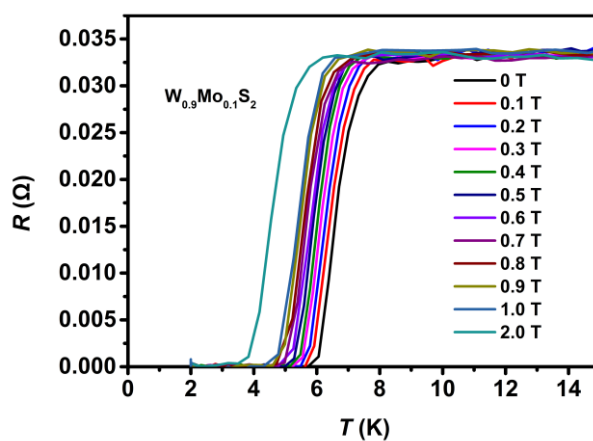

**Figure S13.** The temperature dependence of the resistances for  $W_{0.9}Mo_{0.1}S_2$  under different magnetic fields.

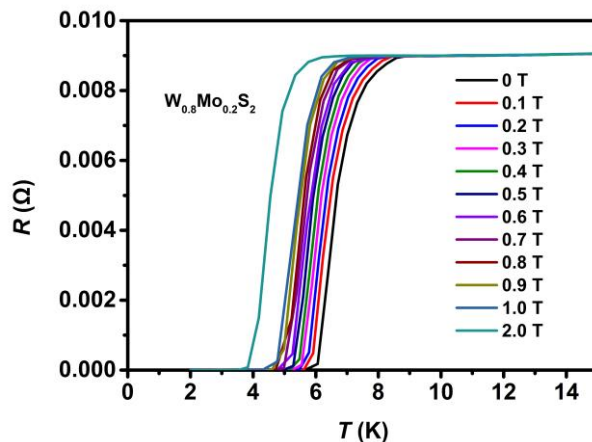

**Figure S14.** The temperature dependence of the resistances for  $W_{0.8}Mo_{0.2}S_2$  under different magnetic fields.

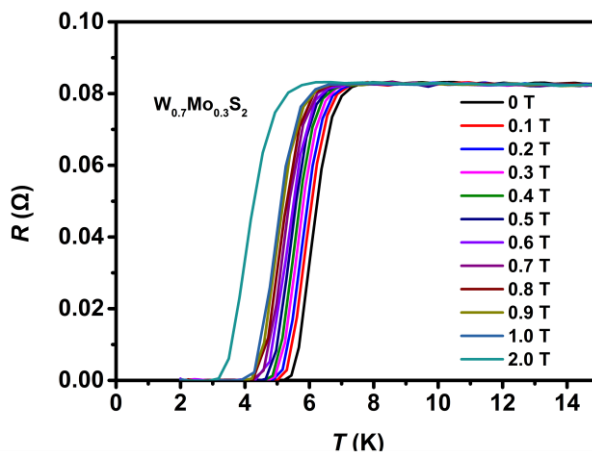

**Figure S15.** The temperature dependence of the resistances for  $W_{0.7}Mo_{0.3}S_2$  under different magnetic fields.

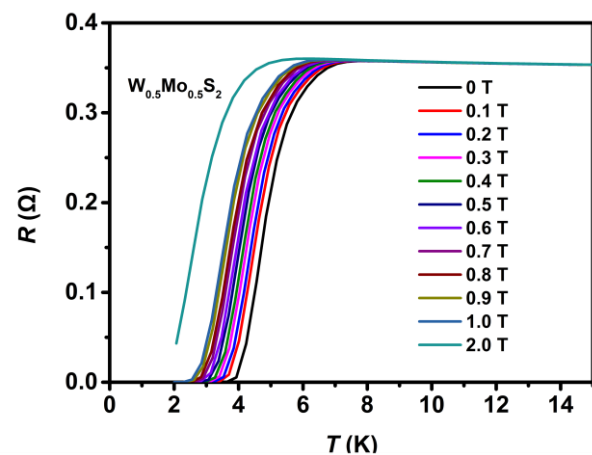

**Figure S16.** The temperature dependence of the resistances for  $W_{0.5}Mo_{0.5}S_2$  under different magnetic fields.

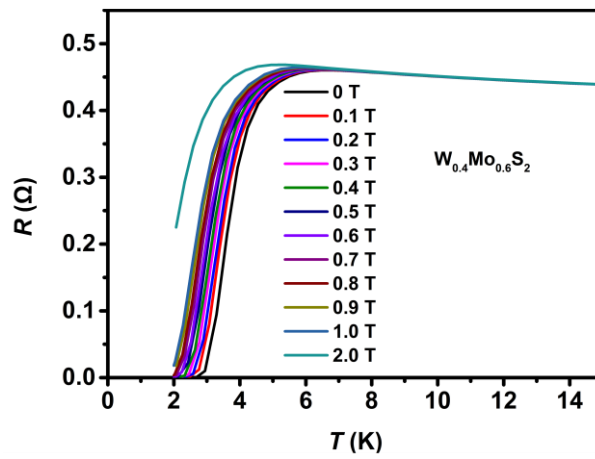

**Figure S17.** The temperature dependence of the resistances for  $W_{0.4}Mo_{0.6}S_2$  under different magnetic fields.

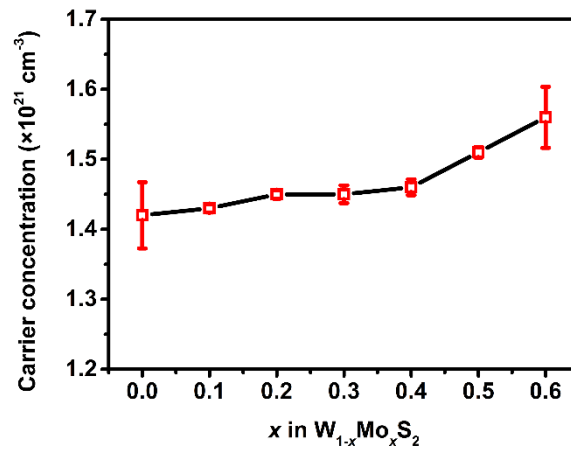

**Figure S18.** Bulk carrier concentration of  $W_{1-x}Mo_xS_2$ .

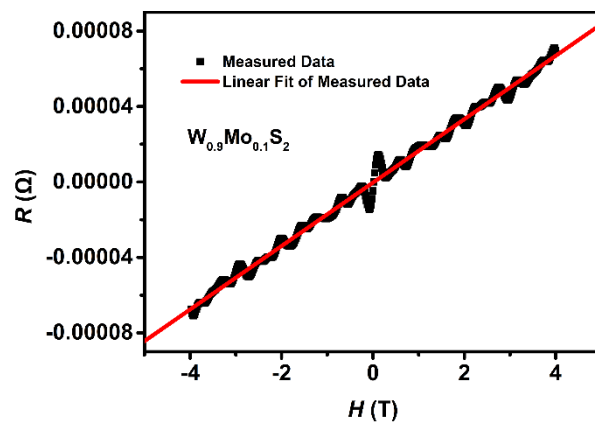

**Figure S19.** The curve of Hall resistance varies with the magnetic field for  $W_{0.9}Mo_{0.1}S_2$ .



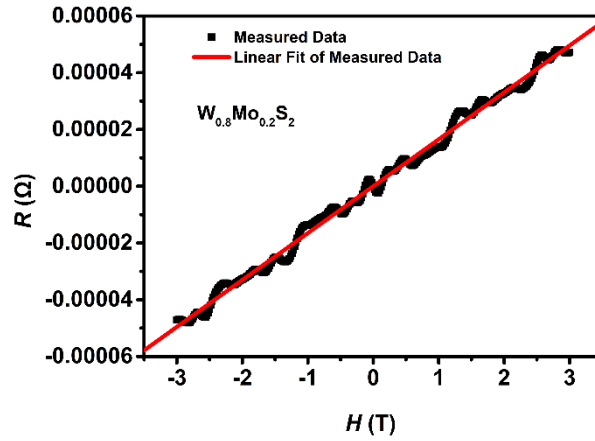

**Figure S20.** The curve of Hall resistance varies with the magnetic field for  $W_{0.8}Mo_{0.2}S_2$ .

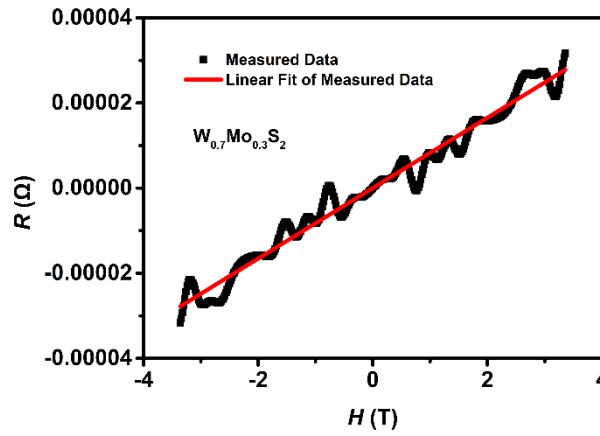

**Figure S21.** The curve of Hall resistance varies with the magnetic field for  $W_{0.7}Mo_{0.3}S_2$ .

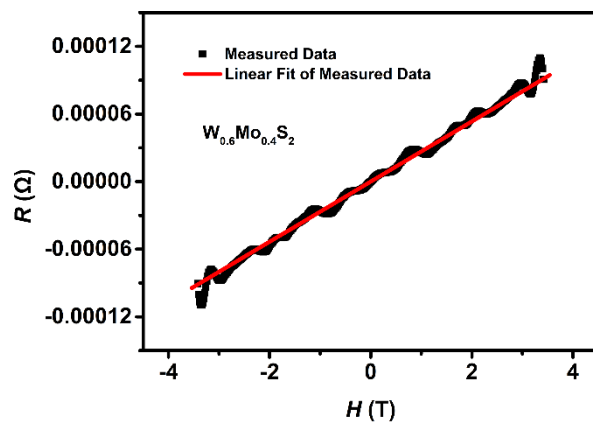

**Figure S22.** The curve of Hall resistance varies with the magnetic field for  $W_{0.6}Mo_{0.4}S_2$ .

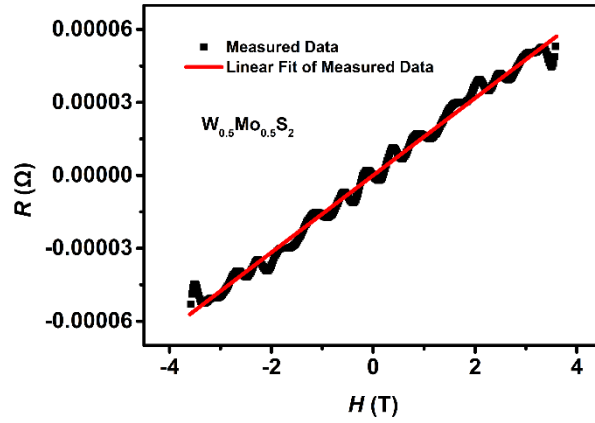

**Figure S23.** The curve of Hall resistance varies with the magnetic field for  $W_{0.5}Mo_{0.5}S_2$ .

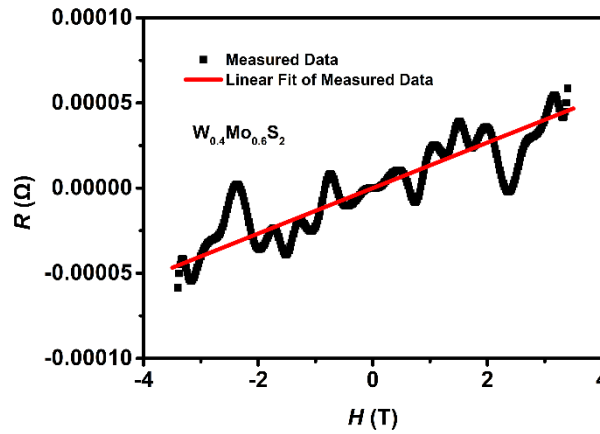

**Figure S24.** The curve of Hall resistance varies with the magnetic field for  $W_{0.4}Mo_{0.6}S_2$ .

**Table S1** Geometric dimension and R-H curve slope of  $W_{1-x}Mo_xS_2$  samples in Hall measurement

| $x$ in $W_{(1-x)}Mo_xS_2$ | Slope( $R/H$ )         | The standard deviation of Slope | Thickness/cm         |
|---------------------------|------------------------|---------------------------------|----------------------|
| 1                         | $1.681 \times 10^{-5}$ | $6.568 \times 10^{-8}$          | $2.6 \times 10^{-2}$ |
| 2                         | $1.653 \times 10^{-5}$ | $7.080 \times 10^{-8}$          | $2.6 \times 10^{-2}$ |
| 3                         | $8.273 \times 10^{-6}$ | $7.275 \times 10^{-8}$          | $5.2 \times 10^{-2}$ |
| 4                         | $2.670 \times 10^{-5}$ | $2.100 \times 10^{-7}$          | $1.6 \times 10^{-2}$ |
| 5                         | $1.588 \times 10^{-5}$ | $8.043 \times 10^{-8}$          | $2.6 \times 10^{-2}$ |
| 6                         | $1.336 \times 10^{-5}$ | $3.861 \times 10^{-7}$          | $3.0 \times 10^{-2}$ |

| $x$ in $\text{W}_{(1-x)}\text{Mo}_x\text{S}_2$ | $n(\text{cm}^{-3})$   | The standard deviation of $n$ |
|------------------------------------------------|-----------------------|-------------------------------|
| 1                                              | $1.43 \times 10^{21}$ | $5.90 \times 10^{18}$         |
| 2                                              | $1.45 \times 10^{21}$ | $6.20 \times 10^{18}$         |
| 3                                              | $1.45 \times 10^{21}$ | $1.27 \times 10^{19}$         |
| 4                                              | $1.46 \times 10^{21}$ | $1.14 \times 10^{19}$         |
| 5                                              | $1.51 \times 10^{21}$ | $7.60 \times 10^{18}$         |
| 6                                              | $1.56 \times 10^{21}$ | $4.37 \times 10^{19}$         |
